# Supplementary material for: Concurrent alloying and vacancy engineering for intensifying hydrogen spillover towards alcohol–water co-electrolysis
Source: Royal Society of Chemistry journal article supplement (doi:10.1039/d3ta01766d), 2023-01-01
Supplement: d3ta01766d1.pdf [file d3ta01766d1.pdf]

**Supporting Information for**  
**Concurrent alloying and vacancy engineering for intensifying**  
**hydrogen spillover towards alcohol–water co-electrolysis**

Hui Xu, Kun Wang, Guangyu He\*, Haiqun Chen\*

*Key Laboratory of Advanced Catalytic Materials and Technology, Advanced  
Catalysis and Green Manufacturing Collaborative Innovation Center, Changzhou  
University, Changzhou, Jiangsu Province 213164, China*

Corresponding authors: [hegy@cczu.edu.cn](mailto:hegy@cczu.edu.cn) (G. He); [chenhq@cczu.edu.cn](mailto:chenhq@cczu.edu.cn) (H. Chen)

## Computational method

All the DFT calculations are performed by the Vienna Ab initio Simulation Package (VASP) [1] with the projector augmented wave (PAW) method [2]. The exchange-functional is treated using the generalized gradient approximation (GGA) of Perdew-Burke-Ernzerhof (PBE) [3] functional. The energy cutoff for the plane wave basis expansion was set to 400 eV and the force on each atom less than 0.05 eV/Å was set for convergence criterion of geometry relaxation. Partial occupancies of the Kohn–Sham orbitals were allowed using the Gaussian smearing method and a width of 0.2 eV. The interface between RuO<sub>2</sub> and Ru/PdRu was built, named as Ru-RuO<sub>2</sub> and PdRu-RuO<sub>2</sub>, respectively. The Brillouin zone was sampled with Monkhorst mesh of 1×1×1. The self-consistent calculations apply a convergence energy threshold of 10<sup>-4</sup> eV and a force convergence of 0.05 eV/Å. The H-transfer process was simulated using the climbing image nudged elastic band (ci-NEB) method [4]. The reaction free energy for elementary steps in HER were calculated based on the computational hydrogen electrode (CHE) approximation [5].

The free energy corrections were considered at the temperature of 298 K, following:

$$\Delta G = \Delta E + \Delta G_{\text{ZPE}} + \Delta G_{\text{U}} - T\Delta S$$

where  $\Delta E$ ,  $\Delta G_{\text{ZPE}}$ ,  $\Delta G_{\text{U}}$ , and  $\Delta S$  refer to the DFT calculated energy change, the correction from zero-point energy, the correction from inner energy and the correction from entropy [6].

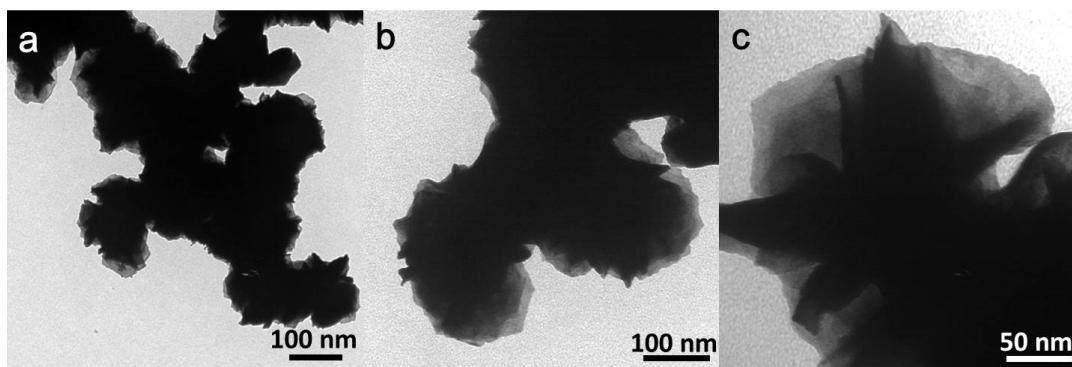

**Fig.S1** TEM images of the metallene-like Pd nanostructures with different

magnifications.

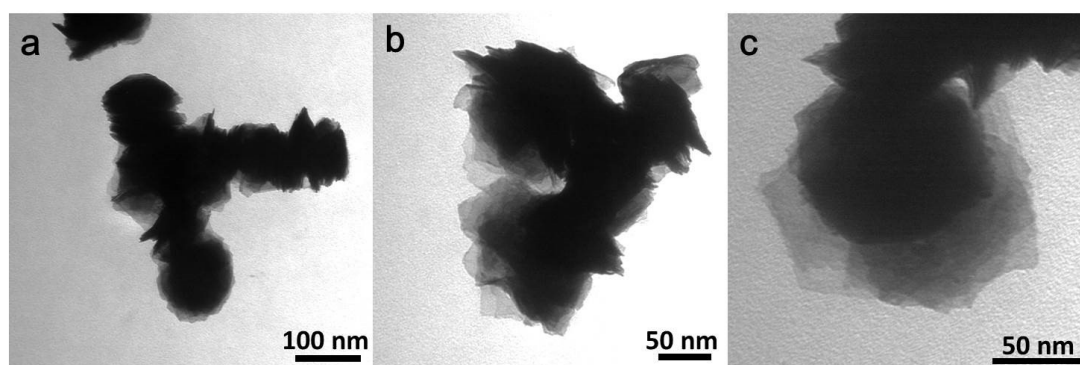

**Fig.S2** TEM images of the metallene-like PdCu nanostructures with different magnifications.

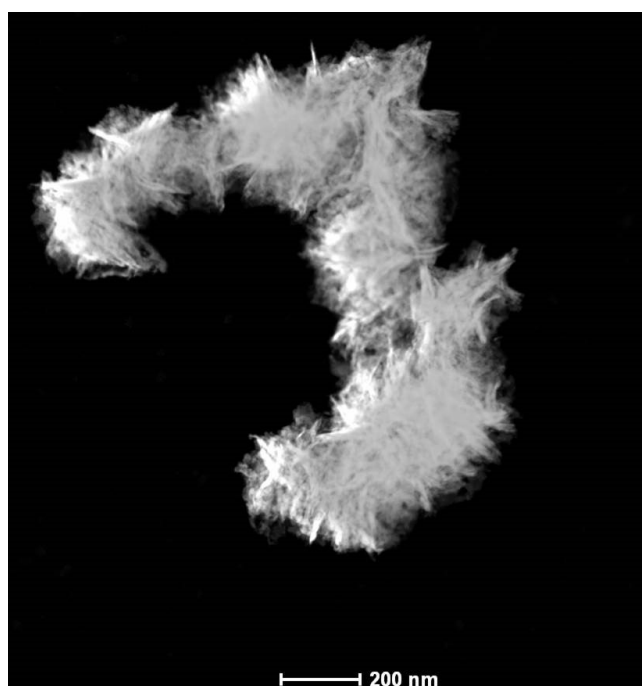

**Fig.S3** STEM image of the metallene-like PdRu-RuO<sub>2</sub> nanostructure.

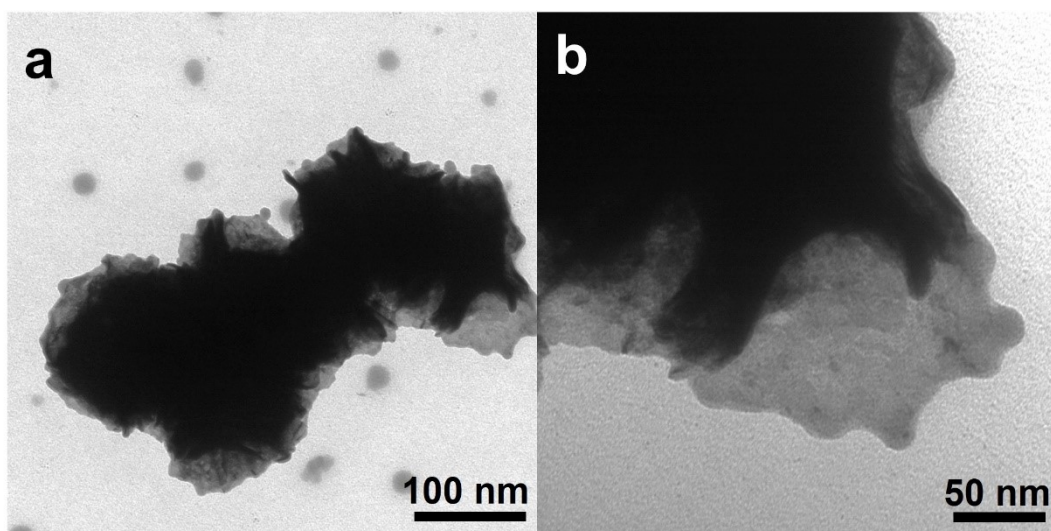

**Fig.S4** TEM image of the metallene-like PdRu-RuO<sub>2</sub> nanostructure with different magnifications.

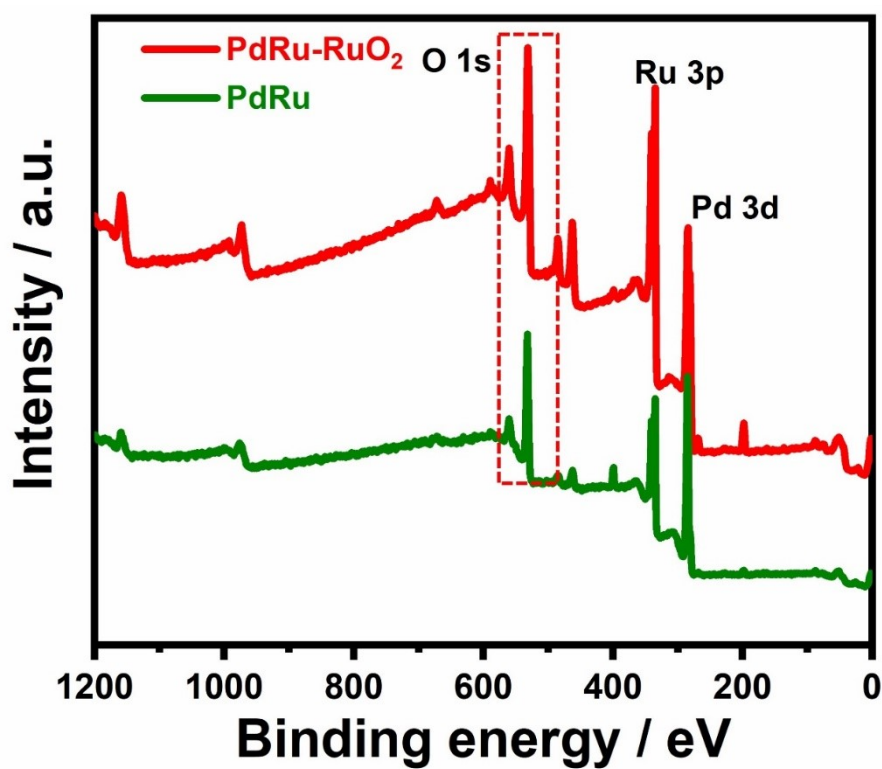

**Fig.S5** XPS survey spectra of the PdRu-RuO<sub>2</sub> and PdRu nanostructure.

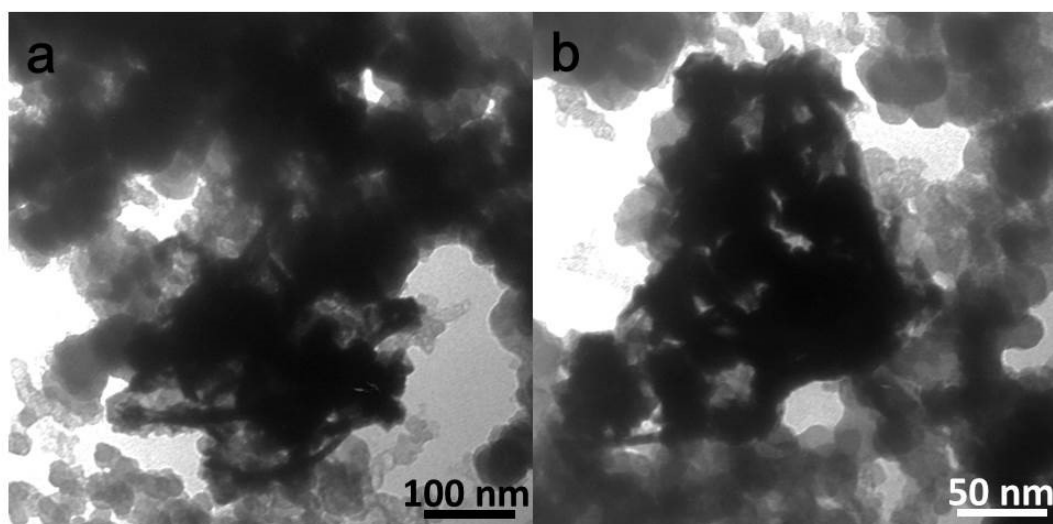

**Fig.S6** TEM image of the carbon black loaded PdRu-RuO<sub>2</sub> nanostructure.

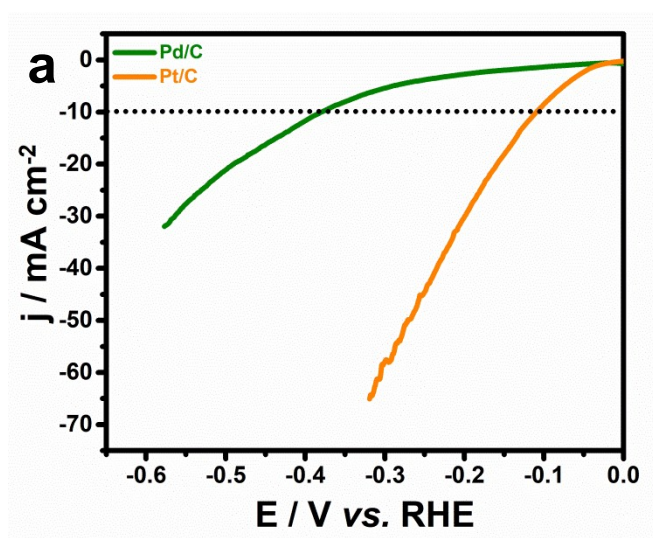

**Fig.S7** LSV polarization curves of Pd/C and Pt/C in 1 M KOH solution.

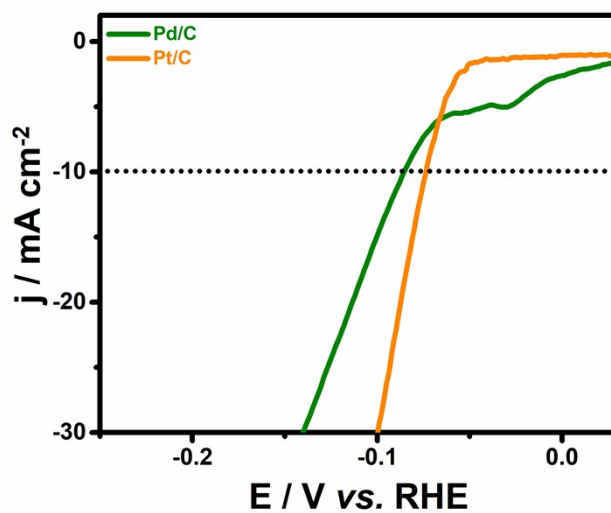

**Fig.S8** LSV polarization curves of Pd/C and Pt/C in 0.5 M  $\text{H}_2\text{SO}_4$  solution.

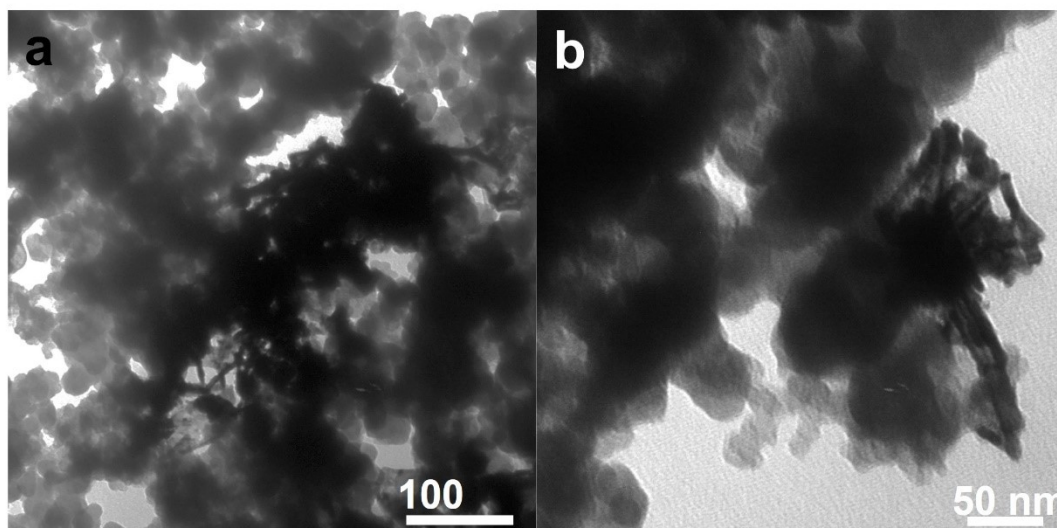

**Fig.S9** TEM image of the carbon black loaded PdRu-RuO<sub>2</sub>/C after long-time electrochemical operation.

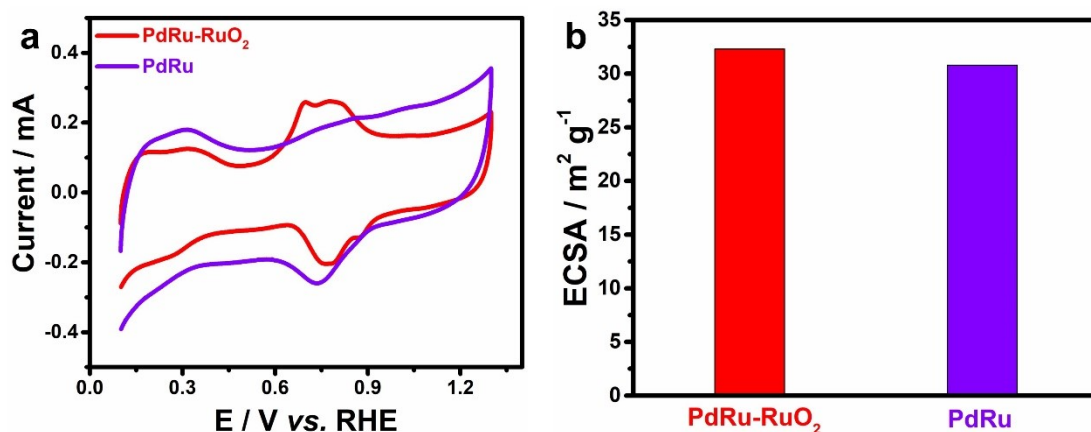

**Fig.S10** (a) CV curves of PdRu-RuO<sub>2</sub>/C and PdRu/C in 1 M KOH solution. (b) Histograms for the ECSA of PdRu-RuO<sub>2</sub>/C and PdRu/C.

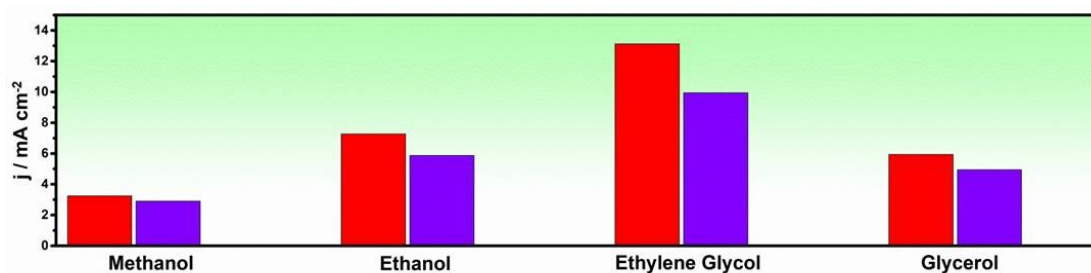

**Fig.S11** Histogram for the specific activities of MOR, EOR, EGOR, and GOR catalyzed by PdRu-RuO<sub>2</sub>/C and PdRu/C.

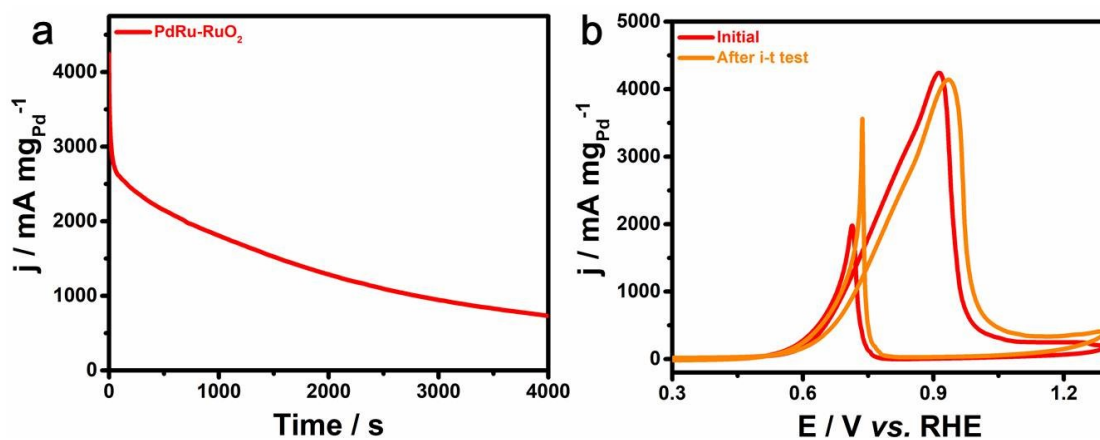

**Fig.S12** (a) i-t curve of PdRu-RuO<sub>2</sub>/C for EGOR. (b) CV curves of PdRu-RuO<sub>2</sub>/C before and after i-t test.

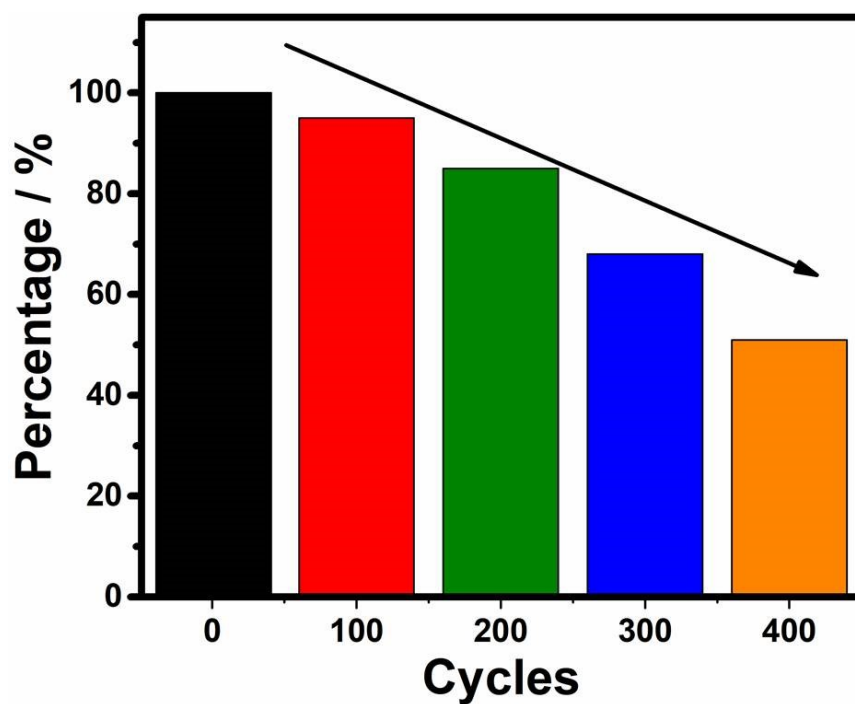

**Fig.S13** Histogram of the percentage of mass activity when normalized with the oxidation peak current.

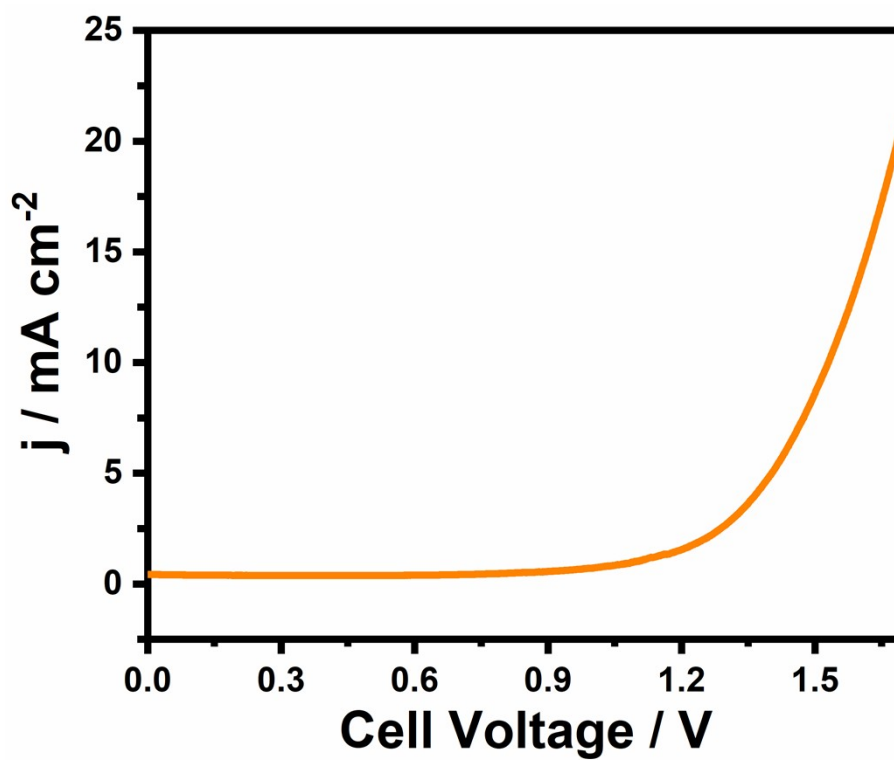

**Fig.S14** LSV curve of PdRu-RuO<sub>2</sub>/C for driving overall water splitting in 1 M KOH

electrolyte.

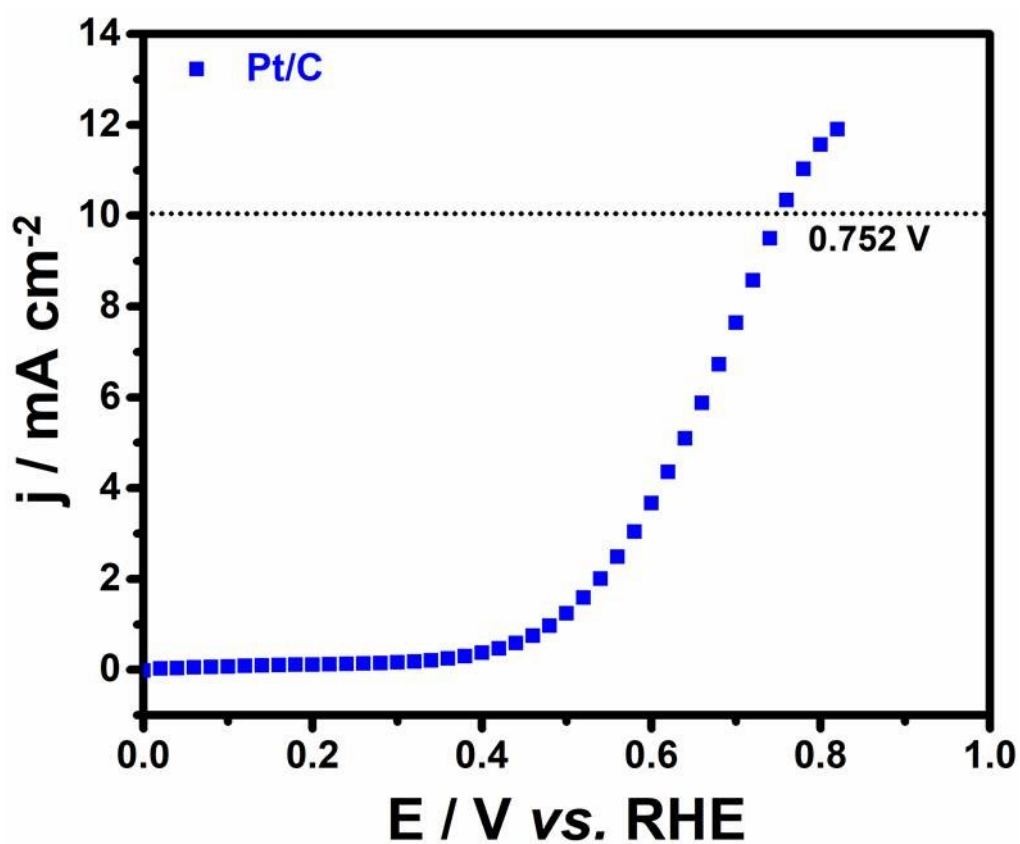

**Fig.S15** LSV curve of Pt/C for driving HER and EOR in an aqueous solution containing 1 M KOH and 1 M  $\text{CH}_3\text{CH}_2\text{OH}$ .

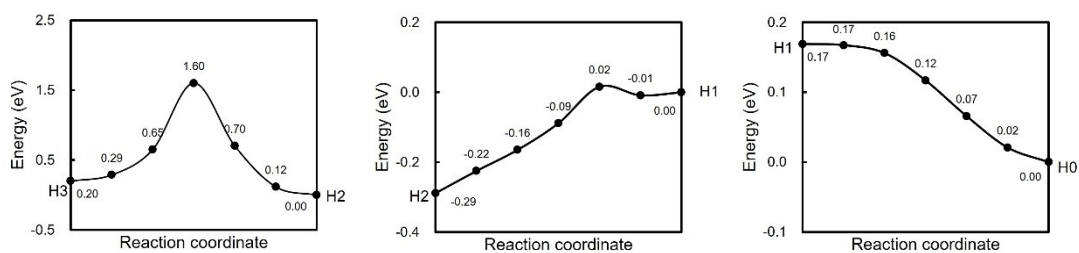

**Fig.S16** Hydrogen transfer energy of different active sites based on PdRu-RuO<sub>2</sub>.

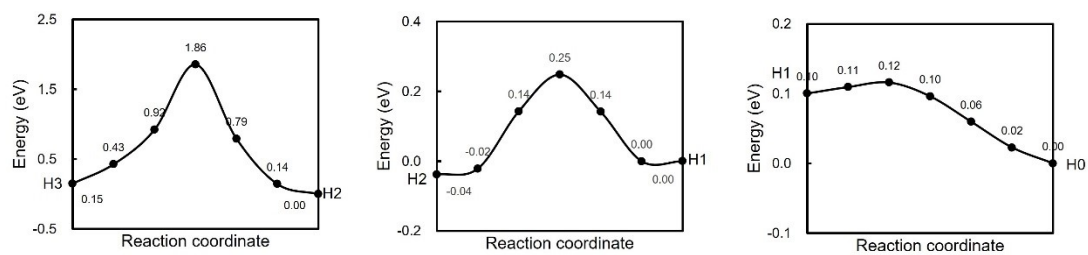

**Fig.S17** Hydrogen transfer energy of different active sites based on Ru-RuO<sub>2</sub>.

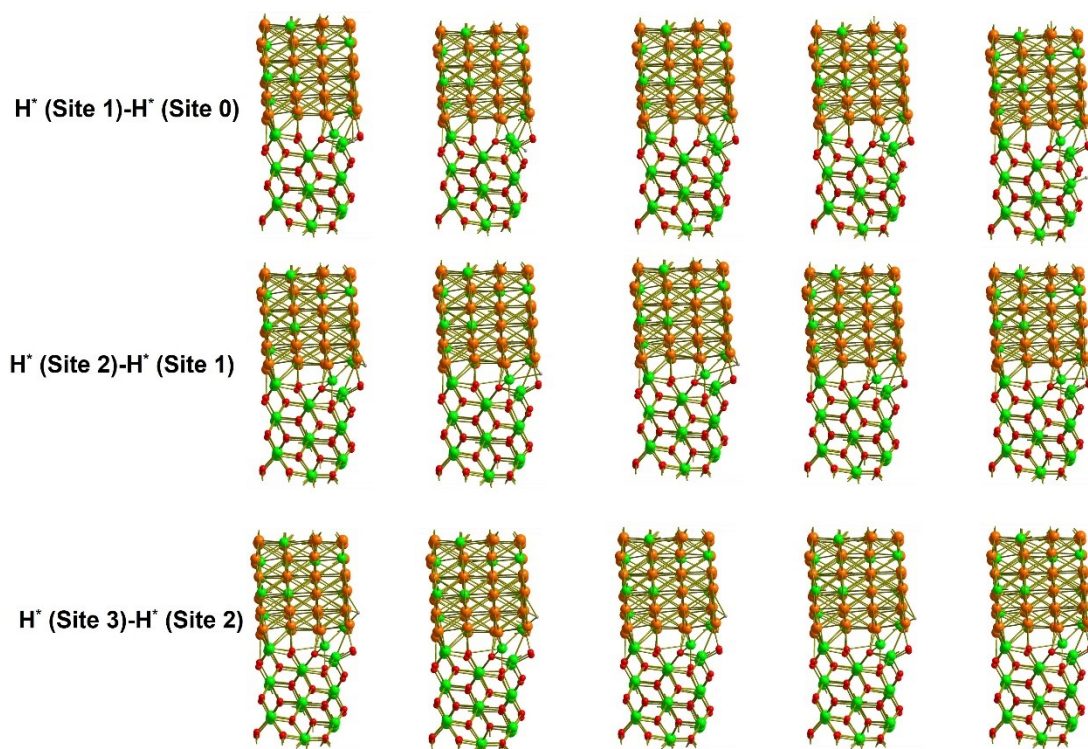

**Fig.S18** Hydrogen spillover process of different active sites based on PdRu-RuO<sub>2</sub>.

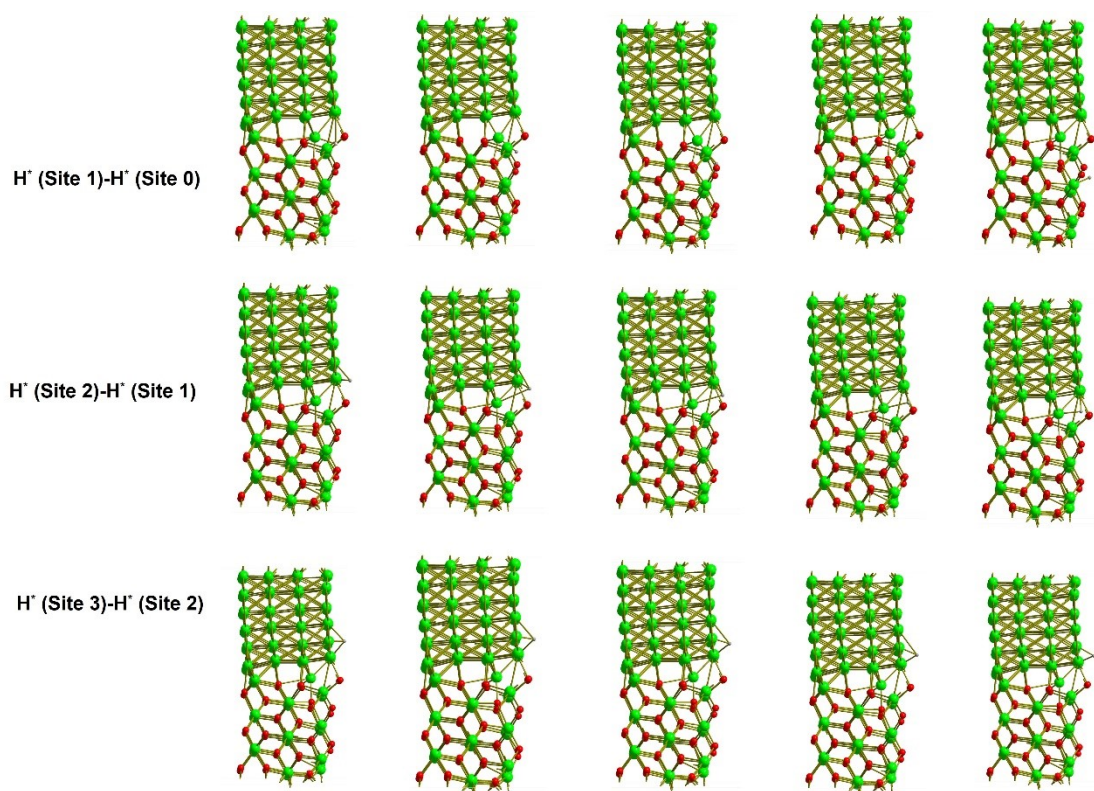

**Fig.S19** Hydrogen spillover process of different active sites based on Ru-RuO<sub>2</sub>.

**Table S1** Summary of the work functions of different materials

| Catalyst         | Work function (eV) |
|------------------|--------------------|
| Pd               | 5.12               |
| Ru               | 4.71               |
| PdRu             | 5.05               |
| RuO <sub>2</sub> | 5.13               |

## References

- [1] Kresse, G.; Furthmüller, J. *Comp Mater Sci* 1996, 6, (1), 15-50.
- [2] Blöchl, P. E. *Phys. Rev. B* 1994, 50, (24), 17953-17979.
- [3] Perdew, J. P.; Chevary, J. A.; Vosko, S. H.; Jackson, K. A.; Pederson, M. R.; Singh, D. J.; Fiolhais, C. *Phys. Rev. B* 1992, 46, (11), 6671-6687.

- [4] Henkelman, G.; Uberuaga, B. P.; Jónsson, H., A climbing image nudged elastic band method for finding saddle points and minimum energy paths. *The Journal of Chemical Physics* 2000, 113 (22), 9901-9904.
- [5] Nørskov, J. K.; Rossmeisl, J.; Logadottir, A.; Lindqvist, L.; Kitchin, J. R.; Bligaard, T.; Jónsson, H., Origin of the Overpotential for Oxygen Reduction at a Fuel-Cell Cathode. *The Journal of Physical Chemistry B* 2004, 108 (46), 17886-17892.
- [6] Guo, C.; Tian, X.; Fu, X.; Qin, G.; Long, J.; Li, H.; Jing, H.; Zhou, Y.; Xiao, J., Computational Design of Spinel Oxides through Coverage-Dependent Screening on the Reaction Phase Diagram. *ACS Catalysis* 2022, 12 (11), 6781-6793.
